# Supplementary material
Source: Springer Nature journal article supplement (https://www.springermedizin.de/resource/supplementary/12958_2008_484_MOESM1_ESM.pdf/9568056)
Supplement: MOESM1 [file 9568056]

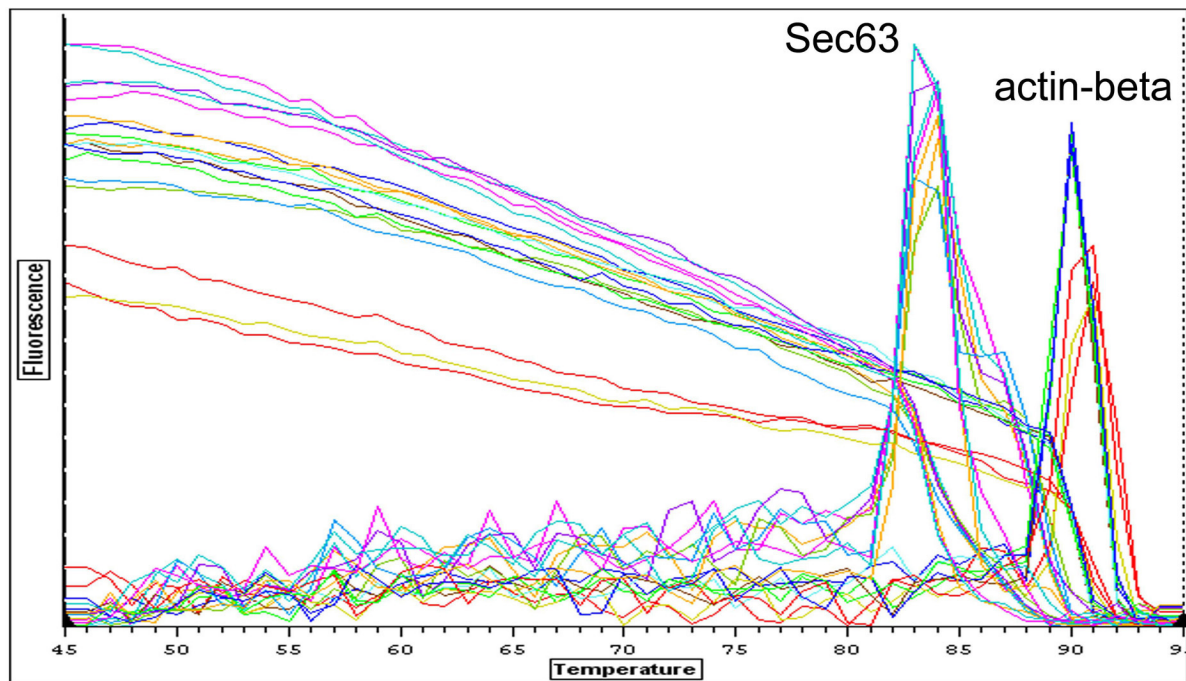

Melting Curve from 45-95°C, read every 1.0 °C, hold 10sec
